# Supplementary material for: Factors influencing compliance with endoscopy final rinsing water standards: a study in a tertiary hospital setting
Source: PeerJ. 2025 Oct 6;13:e20134. doi: 10.7717/peerj.20134 (PMC12510251; doi:10.7717/peerj.20134)
Supplement: Supplemental Information 1 [file peerj-13-20134-s001.xlsx]

## Sheet: figure1
Time	Location	Bacterial name	Result	Standard values	Whether the result qualified
2022-10-18	location 1		0	≤10CFU/100mL	1
2022-10-18	location 2		0	≤10CFU/100mL	1
2022-10-18	location 3		0	≤10CFU/100mL	1
2022-10-18	location 4		0	≤10CFU/100mL	1
2022-10-18	location 5		0	≤10CFU/100mL	1
2022-10-18	location 6		0	≤10CFU/100mL	1
2022-11-16	location 1		0	≤10CFU/100mL	1
2022-11-16	location 2		0	≤10CFU/100mL	1
2022-11-16	location 3		0	≤10CFU/100mL	1
2022-11-16	location 4		0	≤10CFU/100mL	1
2022-11-16	location 5	Others	35	≤10CFU/100mL	0
2022-11-16	location 6		0	≤10CFU/100mL	1
2022-11-21	location 5		0	≤10CFU/100mL	1
2022-12-14	location 1		0	≤10CFU/100mL	1
2022-12-14	location 2		0	≤10CFU/100mL	1
2022-12-14	location 3		0	≤10CFU/100mL	1
2022-12-14	location 4		0	≤10CFU/100mL	1
2022-12-14	location 5	Cupriavidus pauculais,Stenotrophomonas maltophilia,others	45	≤10CFU/100mL	0
2022-12-14	location 6		0	≤10CFU/100mL	1
2022-12-20	location 5		0	≤10CFU/100mL	1
2022-12-20	location 5		0	≤10CFU/100mL	1
2023-01-18	location 1	Cupriavidus pauculais	16	≤10CFU/100mL	0
2023-01-18	location 2	Cupriavidus pauculais	20	≤10CFU/100mL	0
2023-01-18	location 3	Stenotrophomonas maltophilia	20	≤10CFU/100mL	0
2023-01-18	location 4	Cupriavidus pauculais	15	≤10CFU/100mL	0
2023-01-18	location 5	Others	30	≤10CFU/100mL	0
2023-01-18	location 6	Others	15	≤10CFU/100mL	0
2023-01-20	location 1		0	≤10CFU/100mL	1
2023-01-20	location 2	Others	70	≤10CFU/100mL	0
2023-01-20	location 3	Stenotrophomonas maltophilia	30	≤10CFU/100mL	0
2023-01-20	location 4	Others	40	≤10CFU/100mL	0
2023-01-20	location 5	Others	100	≤10CFU/100mL	0
2023-01-20	location 6	Others	20	≤10CFU/100mL	0
2023-01-30	location 2		0	≤10CFU/100mL	1
2023-01-30	location 3		0	≤10CFU/100mL	1
2023-01-30	location 4		0	≤10CFU/100mL	1
2023-01-30	location 5		0	≤10CFU/100mL	1
2023-01-30	location 6		0	≤10CFU/100mL	1
2023-02-16	location 1		0	≤10CFU/100mL	1
2023-02-16	location 2	Others	70	≤10CFU/100mL	0
2023-02-16	location 3	Stenotrophomonas maltophilia	7	≤10CFU/100mL	1
2023-02-16	location 4	Cupriavidus pauculais	50	≤10CFU/100mL	0
2023-02-16	location 5	Cupriavidus pauculais	5	≤10CFU/100mL	1
2023-02-16	location 6		0	≤10CFU/100mL	1
2023-02-20	location 2	Cupriavidus pauculais	39	≤10CFU/100mL	0
2023-02-20	location 4		0	≤10CFU/100mL	1
2023-02-27	location 2		0	≤10CFU/100mL	1
2023-03-15	location 1		0	≤10CFU/100mL	1
2023-03-15	location 2		0	≤10CFU/100mL	1
2023-03-15	location 3		0	≤10CFU/100mL	1
2023-03-15	location 4		0	≤10CFU/100mL	1
2023-03-15	location 5		0	≤10CFU/100mL	1
2023-03-15	location 6		0	≤10CFU/100mL	1
2023-04-19	location 1		0	≤10CFU/100mL	1
2023-04-19	location 2		0	≤10CFU/100mL	1
2023-04-19	location 3		0	≤10CFU/100mL	1
2023-04-19	location 4		0	≤10CFU/100mL	1
2023-04-19	location 5		0	≤10CFU/100mL	1
2023-04-19	location 6		0	≤10CFU/100mL	1
2023-05-15	location 1		0	≤10CFU/100mL	1
2023-05-15	location 2	Cupriavidus pauculais	40	≤10CFU/100mL	0
2023-05-15	location 3	Cupriavidus pauculais	50	≤10CFU/100mL	0
2023-05-15	location 4		0	≤10CFU/100mL	1
2023-05-15	location 5		0	≤10CFU/100mL	1
2023-05-15	location 6	Others	60	≤10CFU/100mL	0
2023-05-18	location 2		0	≤10CFU/100mL	1
2023-05-18	location 3		0	≤10CFU/100mL	1
2023-05-18	location 6		0	≤10CFU/100mL	1
2023-06-19	location 1		0	≤10CFU/100mL	1
2023-06-19	location 2	Others	35	≤10CFU/100mL	0
2023-06-19	location 3		0	≤10CFU/100mL	1
2023-06-19	location 4		0	≤10CFU/100mL	1
2023-06-19	location 5		0	≤10CFU/100mL	1
2023-06-19	location 6	Cupriavidus pauculais	20	≤10CFU/100mL	0
2023-06-21	location 2		10	≤10CFU/100mL	1
2023-06-21	location 6		0	≤10CFU/100mL	1
2023-07-19	location 1		1	≤10CFU/100mL	1
2023-07-19	location 2		80	≤10CFU/100mL	0
2023-07-19	location 3		120	≤10CFU/100mL	0
2023-07-19	location 4		70	≤10CFU/100mL	0
2023-07-19	location 5		120	≤10CFU/100mL	0
2023-07-19	location 6		120	≤10CFU/100mL	0
2023-07-21	location 2		16	≤10CFU/100mL	0
2023-07-21	location 3		40	≤10CFU/100mL	0
2023-07-21	location 4		0	≤10CFU/100mL	1
2023-07-21	location 5		0	≤10CFU/100mL	1
2023-07-21	location 6		1	≤10CFU/100mL	1
